# Supplementary material for: Docosahexaenoic acid-acylated curcumin diester alleviates cisplatin-induced acute kidney injury by regulating the effect of gut microbiota on the lipopolysaccharide- and trimethylamine-N-oxide-mediated PI3K/Akt/NF-κB signaling pathway in mice
Source: Royal Society of Chemistry journal article supplement (doi:10.1039/d1fo04178a), 2022-01-01
Supplement: d1fo04178a1.pdf [file d1fo04178a1.pdf]

Curcumin

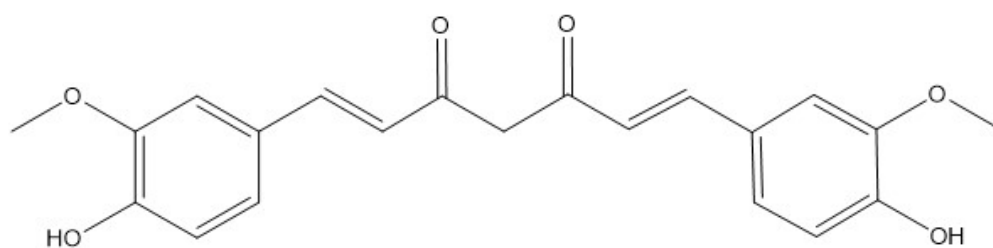

A

DHA

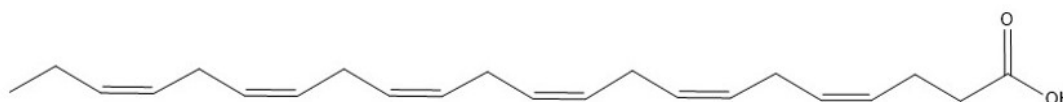

B

Cur-DHA

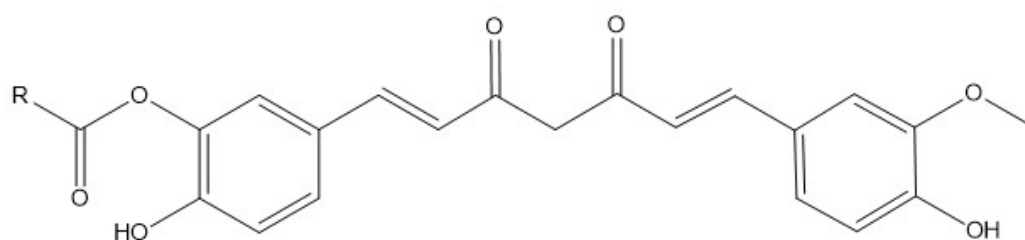

C

Cur-2DHA

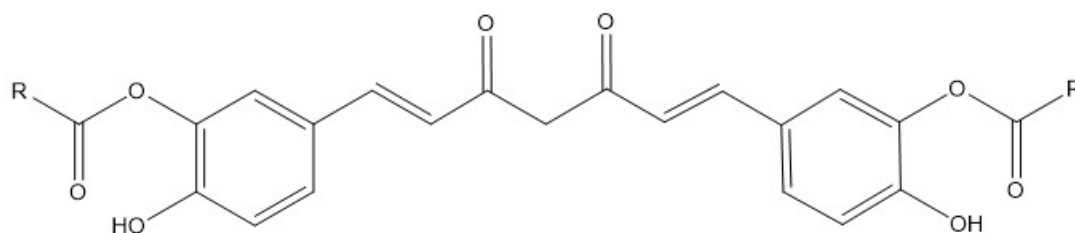

D

Fig. S1. The structure of the curcumin (A), DHA (docosahexaenoic acid, B), Cur-DHA (DHA-acylated curcumin monoester, C) and Cur-2DHA (DHA-acylated curcumin diester, D). R indicates DHA.

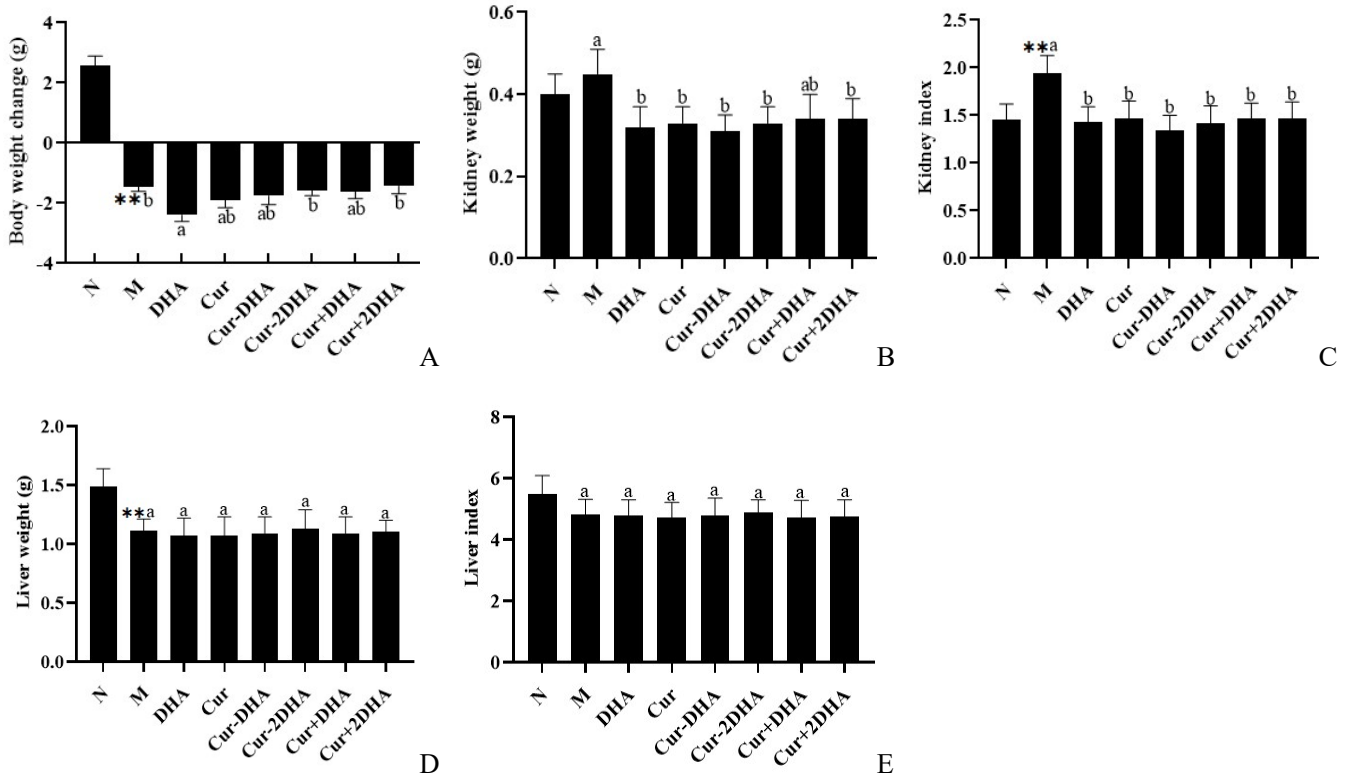

Fig. S2. Effects of different samples on body weight change (A), kidney weight (B), kidney index (C) liver weight (D), and liver index (E) in mice.

Note: All data were expressed as mean  $\pm$  S.E.M. for 8 mice. \*\*Significantly different compared to normal group ( $p < 0.01$ ). Different letters represented significant differences among experimental groups. BUN represented blood urea nitrogen, Cr represented creatinine.

Table S1 Change of alpha diversity index

|          | Shannon index | Simpson index | Chao1 index | ACE index  |
|----------|---------------|---------------|-------------|------------|
| N        | 6.58±0.66     | 0.98±0.09     | 349.7±31.2  | 325.8±33.2 |
| M        | 5.31±0.46     | 0.93±0.09     | 323.8±28.8  | 324.3±30.1 |
| DHA      | 5.97±0.58     | 0.97±0.08     | 364.6±32.7  | 364.2±35.9 |
| Cur      | 5.82±0.54     | 0.96±0.09     | 347.4±31.2  | 349.4±32.4 |
| Cur-DHA  | 5.81±0.55     | 0.95±0.08     | 360.3±31.5  | 357.5±33.2 |
| Cur-2DHA | 5.80±0.53     | 0.96±0.08     | 355.1±31.5  | 352.2±35.1 |
| Cur+DHA  | 5.84±0.54     | 0.96±0.09     | 358.5±35.2  | 358.7±33.3 |
| Cur+2DHA | 5.81±0.49     | 0.96±0.08     | 362.0±32.3  | 362.9±32.9 |

Note: All data were expressed as mean ± S.E.M. for 8 mice.

Table S2 Fatty acid compositions of the kidney in mice

| Fatty acid (%) | N          | M             | DHA          | Cur          | Cur-DHA      | Cur-2DHA    | Cur+ DHA     | Cur+2DHA    |
|----------------|------------|---------------|--------------|--------------|--------------|-------------|--------------|-------------|
| C16:0          | 21.15±1.86 | 19.08±1.65    | 19.81±2.31   | 19.68±1.59   | 20.06±2.36   | 20.45±1.96  | 20.07±2.65   | 18.97±1.71  |
| C16:1          | 0.81±0.09  | 0.43±0.05**ab | 0.33±0.03b   | 0.39±0.05b   | 0.53±0.04a   | 0.34±0.04b  | 0.32±0.03b   | 0.54±0.07a  |
| C18:0          | 14.98±1.69 | 14.42±1.71    | 14.16±1.52   | 14.53±1.65   | 13.56±1.25   | 14.38±1.65  | 14.94±1.53   | 14.01±1.76  |
| C18:1          | 7.02±0.61  | 8.67±0.73**ab | 9.58±0.76a   | 8.82±0.89ab  | 9.06±1.14ab  | 8.26±0.96ab | 7.60±0.69b   | 10.16±1.25a |
| C18:2          | 12.17±1.12 | 14.12±1.15**  | 14.35±1.83   | 13.44±1.51   | 14.82±1.62   | 13.75±1.34  | 13.67±1.55   | 15.80±1.72  |
| C20:4          | 17.73±0.97 | 19.42±1.07a   | 17.79±0.98ab | 18.83±1.04ab | 16.87±0.93b  | 17.00±0.94b | 17.97±0.99ab | 17.07±0.93b |
| C20:5          | 1.58±0.17  | 1.19±0.13c    | 1.47±0.17bc  | 1.16±0.13c   | 1.59±0.10b   | 2.07±0.13a  | 1.66±0.09b   | 1.81±0.11ab |
| C24:0          | 2.22±0.23  | 2.26±0.25     | 2.16±0.24    | 2.17±0.23    | 2.29±0.26    | 2.18±0.27   | 2.16±0.26    | 2.00±0.19   |
| C22:6          | 13.32±0.83 | 11.94±0.75b   | 13.53±0.85ab | 12.95±0.81ab | 14.28±0.89ab | 15.14±0.95a | 14.58±0.91ab | 14.89±0.93a |

Note: All data were expressed as mean ± S.E.M. for 8 mice. \*\*Significantly different compared to controls ( $p < 0.01$ ), Different letters represented significant differences among experimental groups.
